# Supplementary material for: Evaluation of Anesthetic and Cardiorespiratory Effects after Intramuscular Administration of Three Different Doses of Telazol® in Common Marmosets (Callithrix jacchus)
Source: MDPI journal article supplement (doi:10.3390/vetsci10020116), 2023-02-03
Supplement: s1 [file s1]

**Heart Rate (SPO2 monitor)**

| Dose    | 5 mg/kg |       | 10 mg/kg |       | 15 mg/kg |       |
|---------|---------|-------|----------|-------|----------|-------|
| Minutes | Median  | SD    | Median   | SD    | Median   | SD    |
| 5       | 347.5   | 91.65 | 341      | 58.95 | 310      | 57.52 |
| 15      | 393.5   | 52.63 | 229      | 50.53 | 231.5    | 51.33 |
| 30      | 228.5   | 65.8  | 214      | 43.68 | 221.5    | 78.57 |
| 45      |         |       | 225      | 63.23 | 229      | 41.02 |

**SPO2**

| Dose    | 5 mg/kg |      | 10 mg/kg |      | 15 mg/kg |      |
|---------|---------|------|----------|------|----------|------|
| Minutes | Median  | SD   | Median   | SD   | Median   | SD   |
| 5       | 85      | 5.45 | 86       | 7.28 | 88       | 4.6  |
| 15      | 90.5    | 5.81 | 88.5     | 6.49 | 85       | 4.78 |
| 30      | 90      | 3.27 | 90       | 4.8  | 88       | 6.83 |
| 45      |         |      |          | 3.11 | 88.5     | 4.9  |

**Respiration Rate**

| Dose    | 5 mg/kg |       | 10 mg/kg |       | 15 mg/kg |       |
|---------|---------|-------|----------|-------|----------|-------|
| Minutes | Median  | SD    | Median   | SD    | Median   | SD    |
| 5       | 92      | 225.7 | 76       | 29.4  | 74       | 27.34 |
| 15      | 64      | 24.37 | 62       | 15.69 | 58       | 28.35 |
| 30      | 60      | 14.24 | 54       | 16.55 | 66       | 32.28 |
| 45      |         |       | 64       | 19.78 | 56       | 19.42 |

**Heart Rate (Blood pressure monitor)**

| Dose    | 5 mg/kg |       | 10 mg/kg |       | 15 mg/kg |       |
|---------|---------|-------|----------|-------|----------|-------|
| Minutes | Median  | SD    | Median   | SD    | Median   | SD    |
| 5       | 298.5   | 87.64 | 305.5    | 73.56 | 265.5    | 61.49 |
| 15      | 253     | 49.77 | 225      | 46.99 | 209.5    | 53.44 |
| 30      | 240.5   | 70.84 | 192.5    | 49.64 | 204.5    | 71.96 |
| 45      |         |       | 225.5    | 58.14 | 229.5    | 36.04 |

**Blood Pressure Systolic**

| Dose    | 5 mg/kg |       | 10 mg/kg |       | 15 mg/kg |       |
|---------|---------|-------|----------|-------|----------|-------|
| Minutes | Median  | SD    | Median   | SD    | Median   | SD    |
| 5       | 127.45  | 28    | 105.8    | 21.11 | 109.95   | 20.35 |
| 15      | 107.8   | 13.48 | 100.65   | 14.53 | 103.3    | 17.12 |
| 30      | 111.95  | 24    | 100.8    | 10.7  | 111      | 19.39 |
| 45      |         |       | 114.95   | 10.2  | 117.15   | 13.98 |

**Blood Pressure Diastolic**

| Dose    | 5 mg/kg |       | 10 mg/kg |      | 15 mg/kg |       |
|---------|---------|-------|----------|------|----------|-------|
| Minutes | Median  | SD    | Median   | SD   | Median   | SD    |
| 5       | 57.45   | 12.25 | 54.8     | 7.71 | 52.15    | 10.28 |
| 15      | 58.95   | 10.65 | 51       | 7.8  | 46.1     | 5.6   |
| 30      | 56.6    | 12.58 | 51.1     | 7.18 | 51.6     | 11.41 |
| 45      |         |       | 59       | 5.14 | 53.3     | 7.76  |

#### Blood Pressure Mean

| Dose    | 5 mg/kg |       | 10 mg/kg |       | 15 mg/kg |       |
|---------|---------|-------|----------|-------|----------|-------|
| Minutes | Median  | SD    | Median   | SD    | Median   | SD    |
| 5       | 92.15   | 14.32 | 79.83    | 13.85 | 80.66    | 15.09 |
| 15      | 84.4    | 11.58 | 75.49    | 10.56 | 74.5     | 9.77  |
| 30      | 84.5    | 17.75 | 76       | 8.33  | 81.06    | 13.74 |
| 45      |         |       | 84.91    | 6.94  | 84.87    | 10.29 |
