# Supplementary figures and images for: Evaluation of Anesthetic and Cardiorespiratory Effects after Intramuscular Administration of Three Different Doses of Telazol® in Common Marmosets (Callithrix jacchus)
Source: MDPI journal article supplement (doi:10.3390/vetsci10020116), 2023-02-03

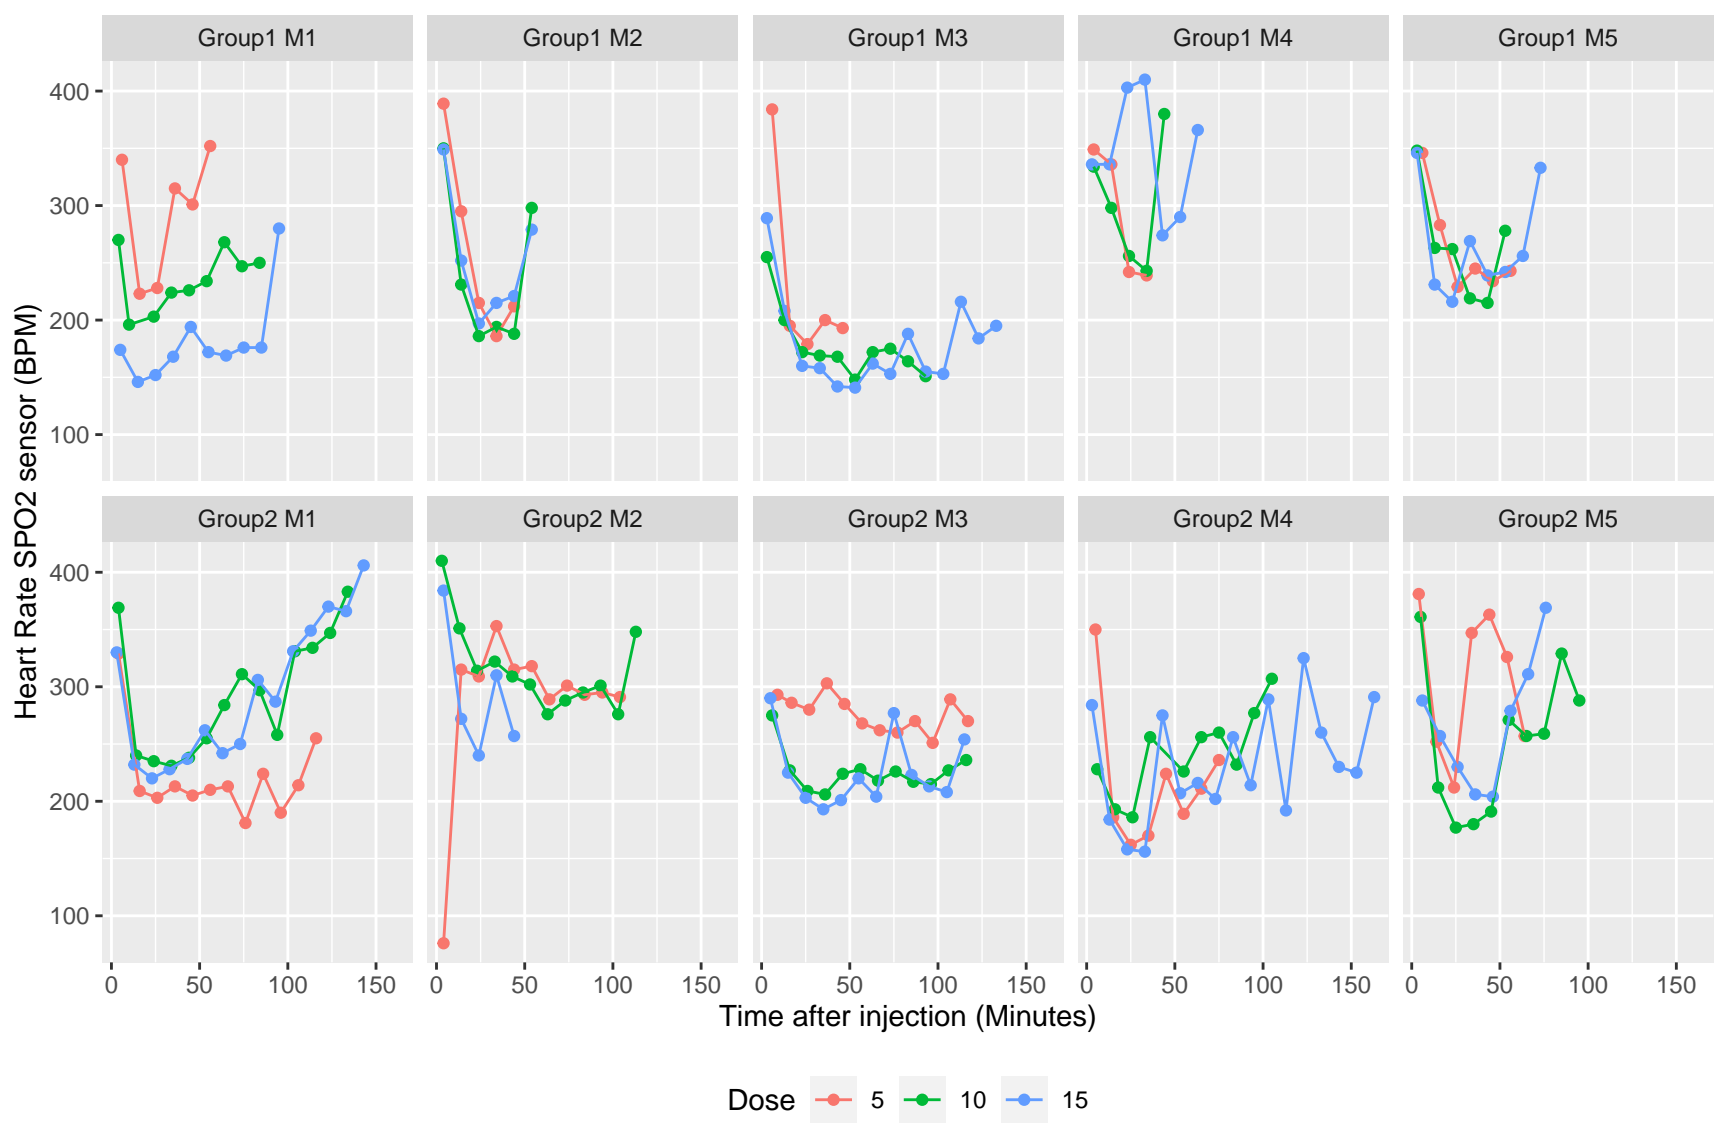

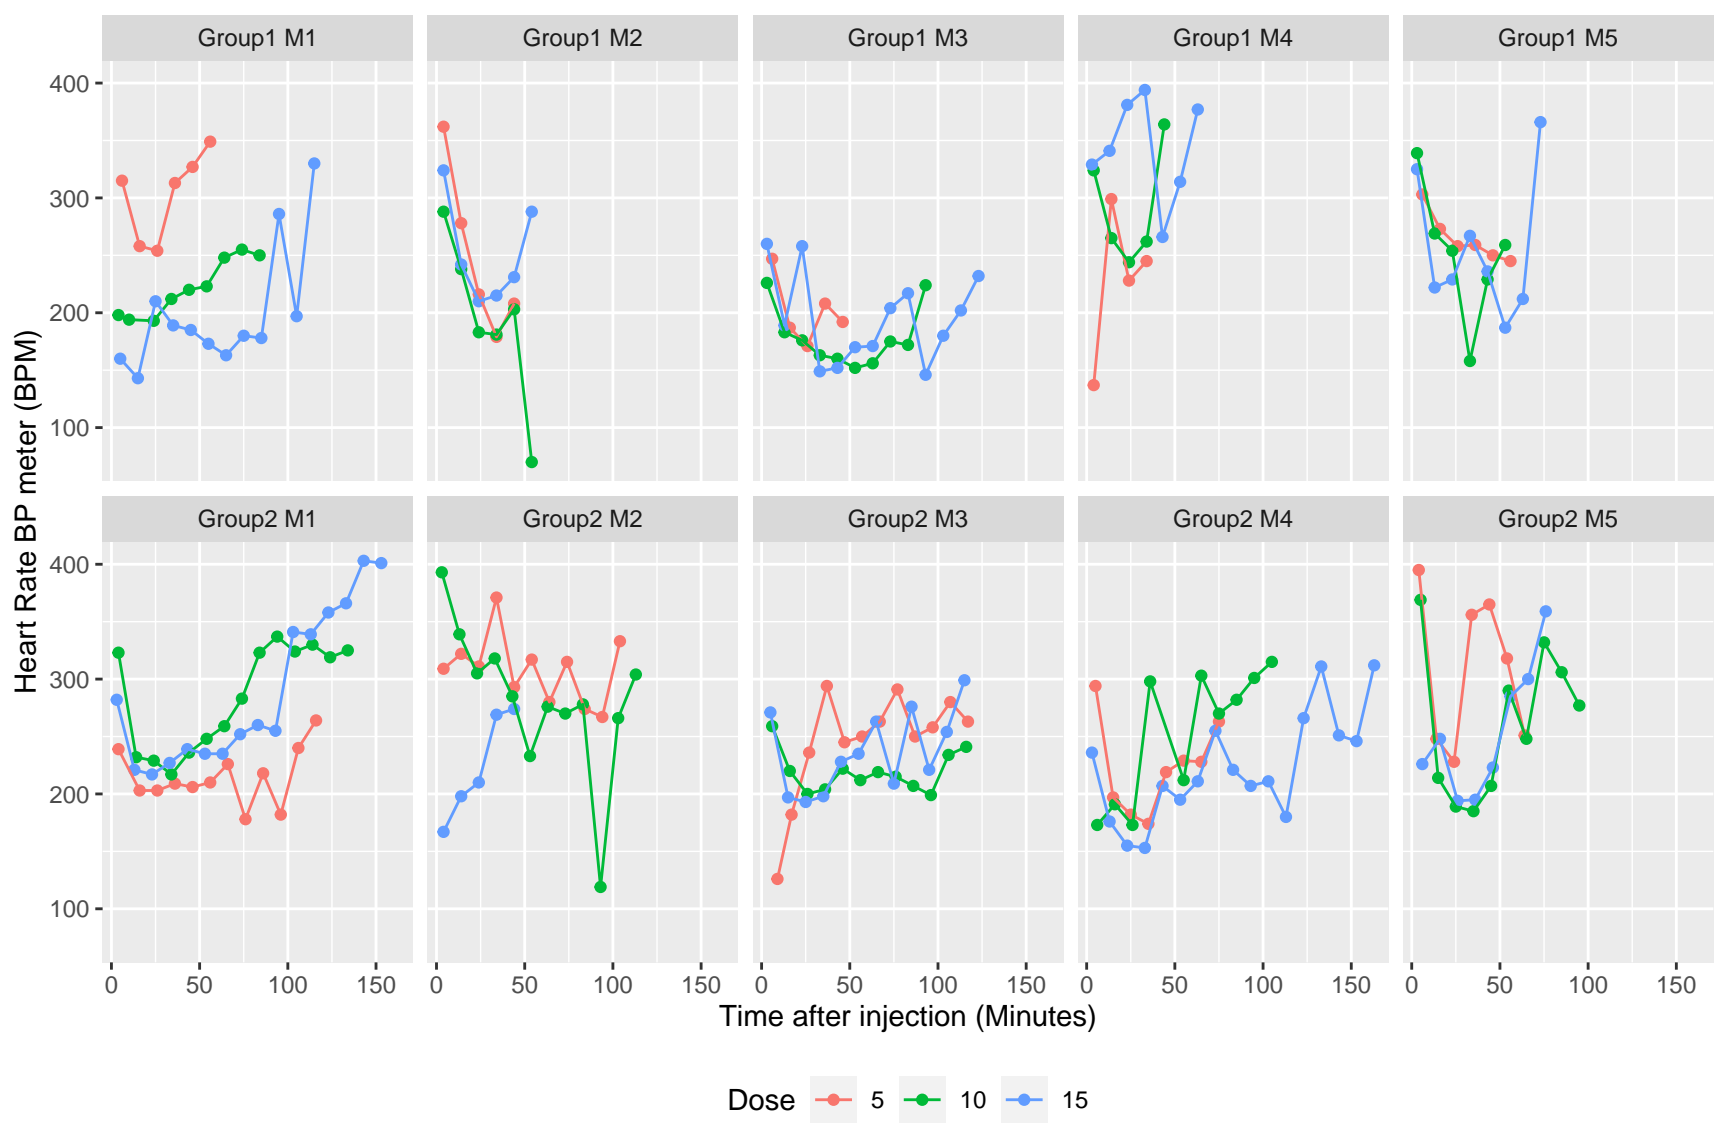

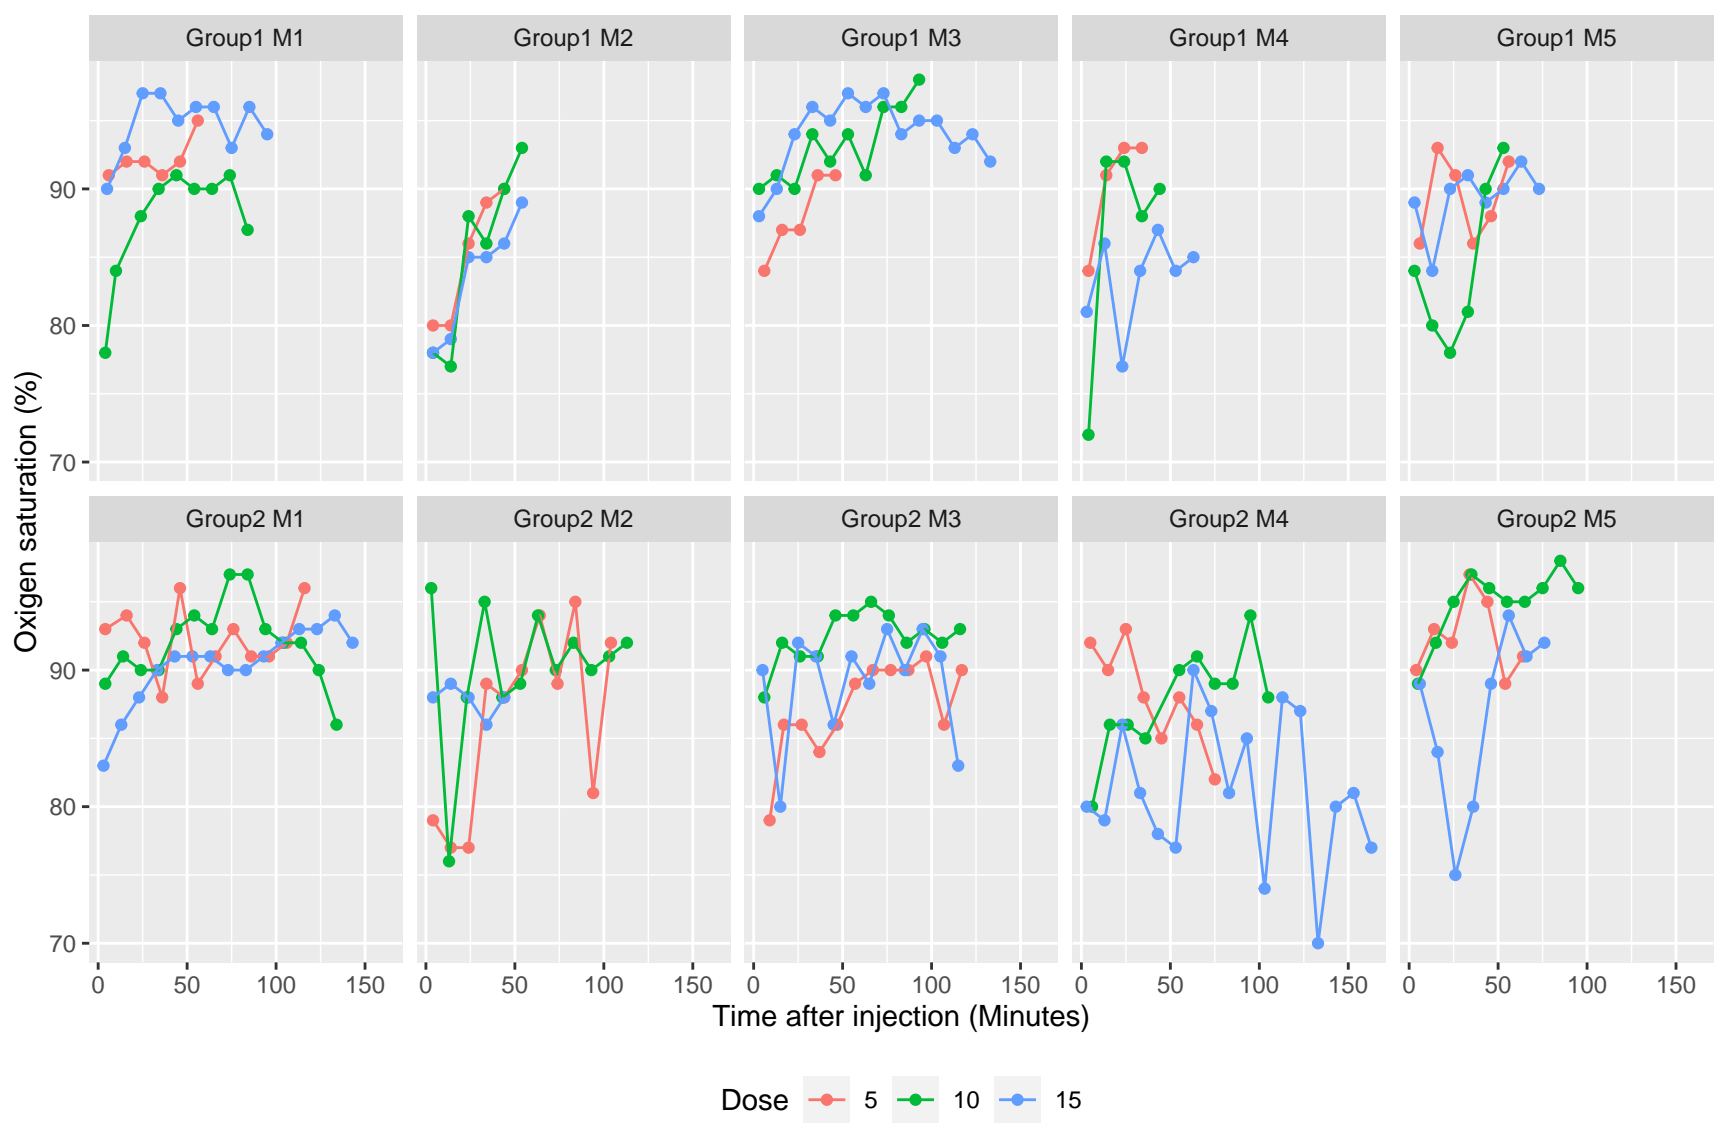

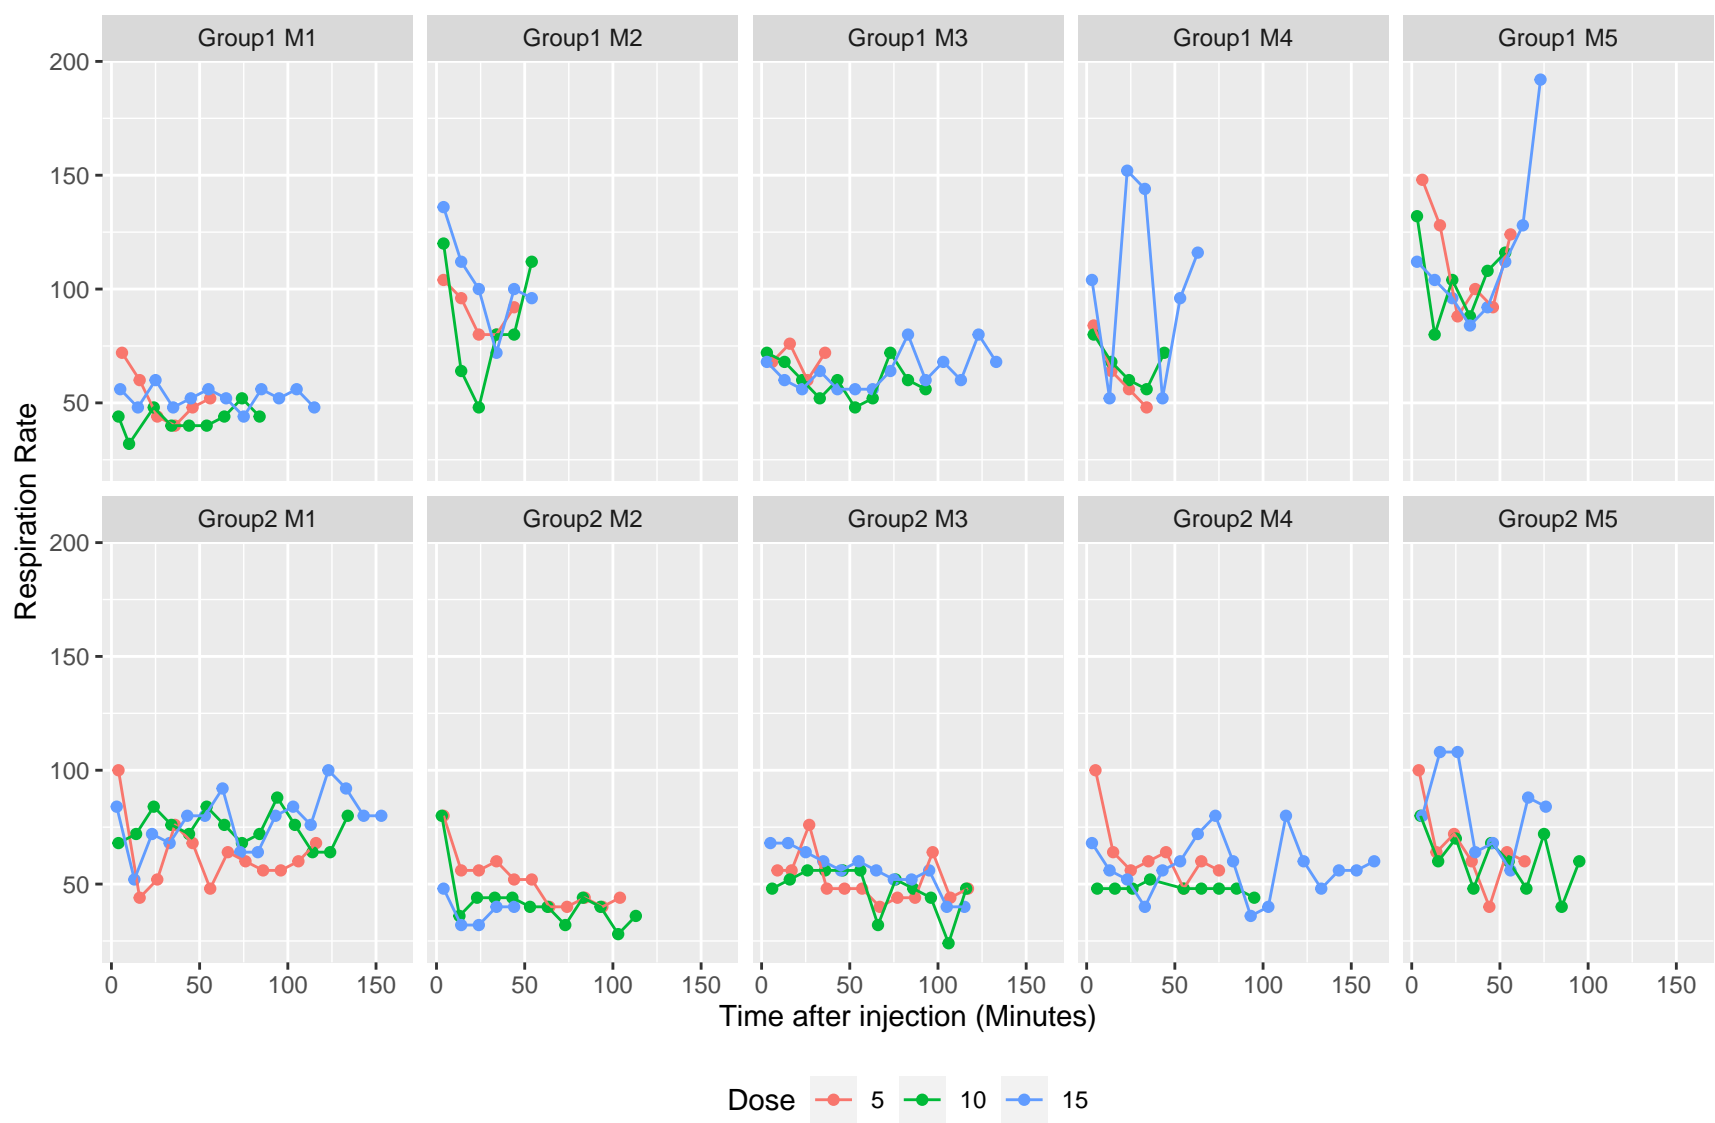

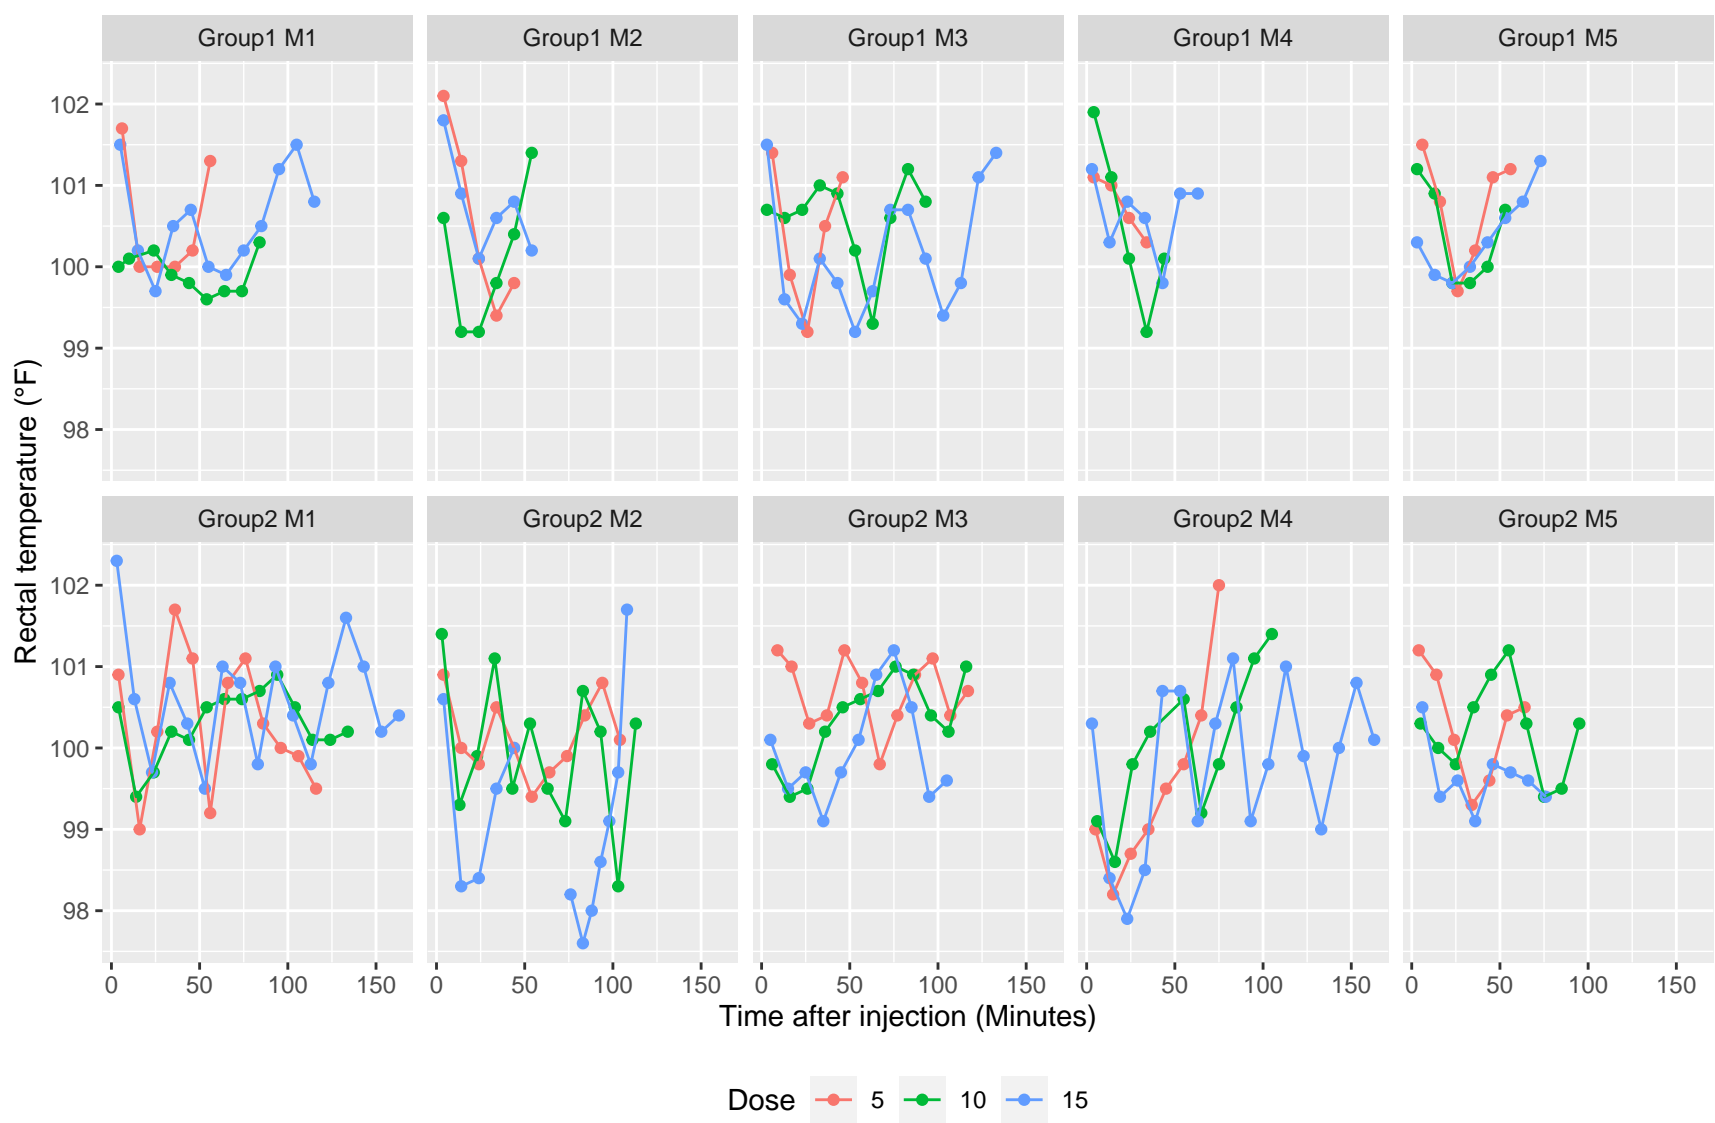

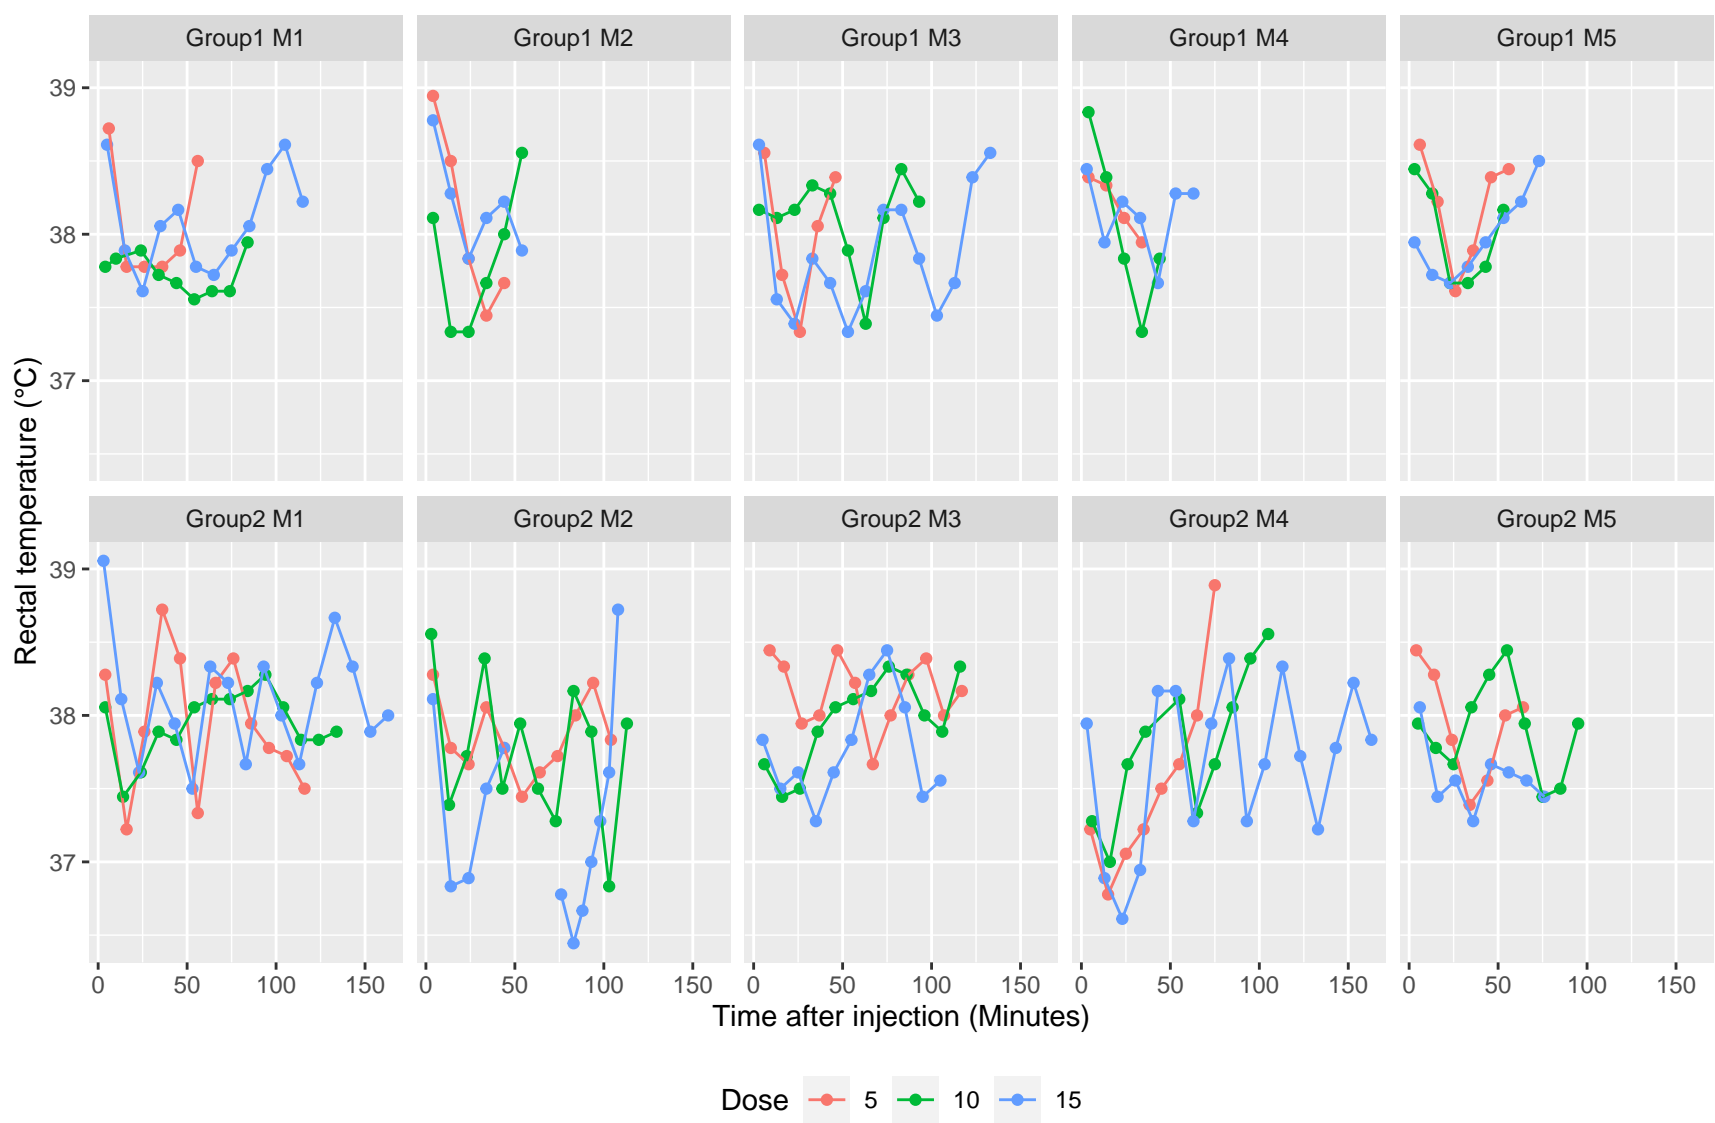

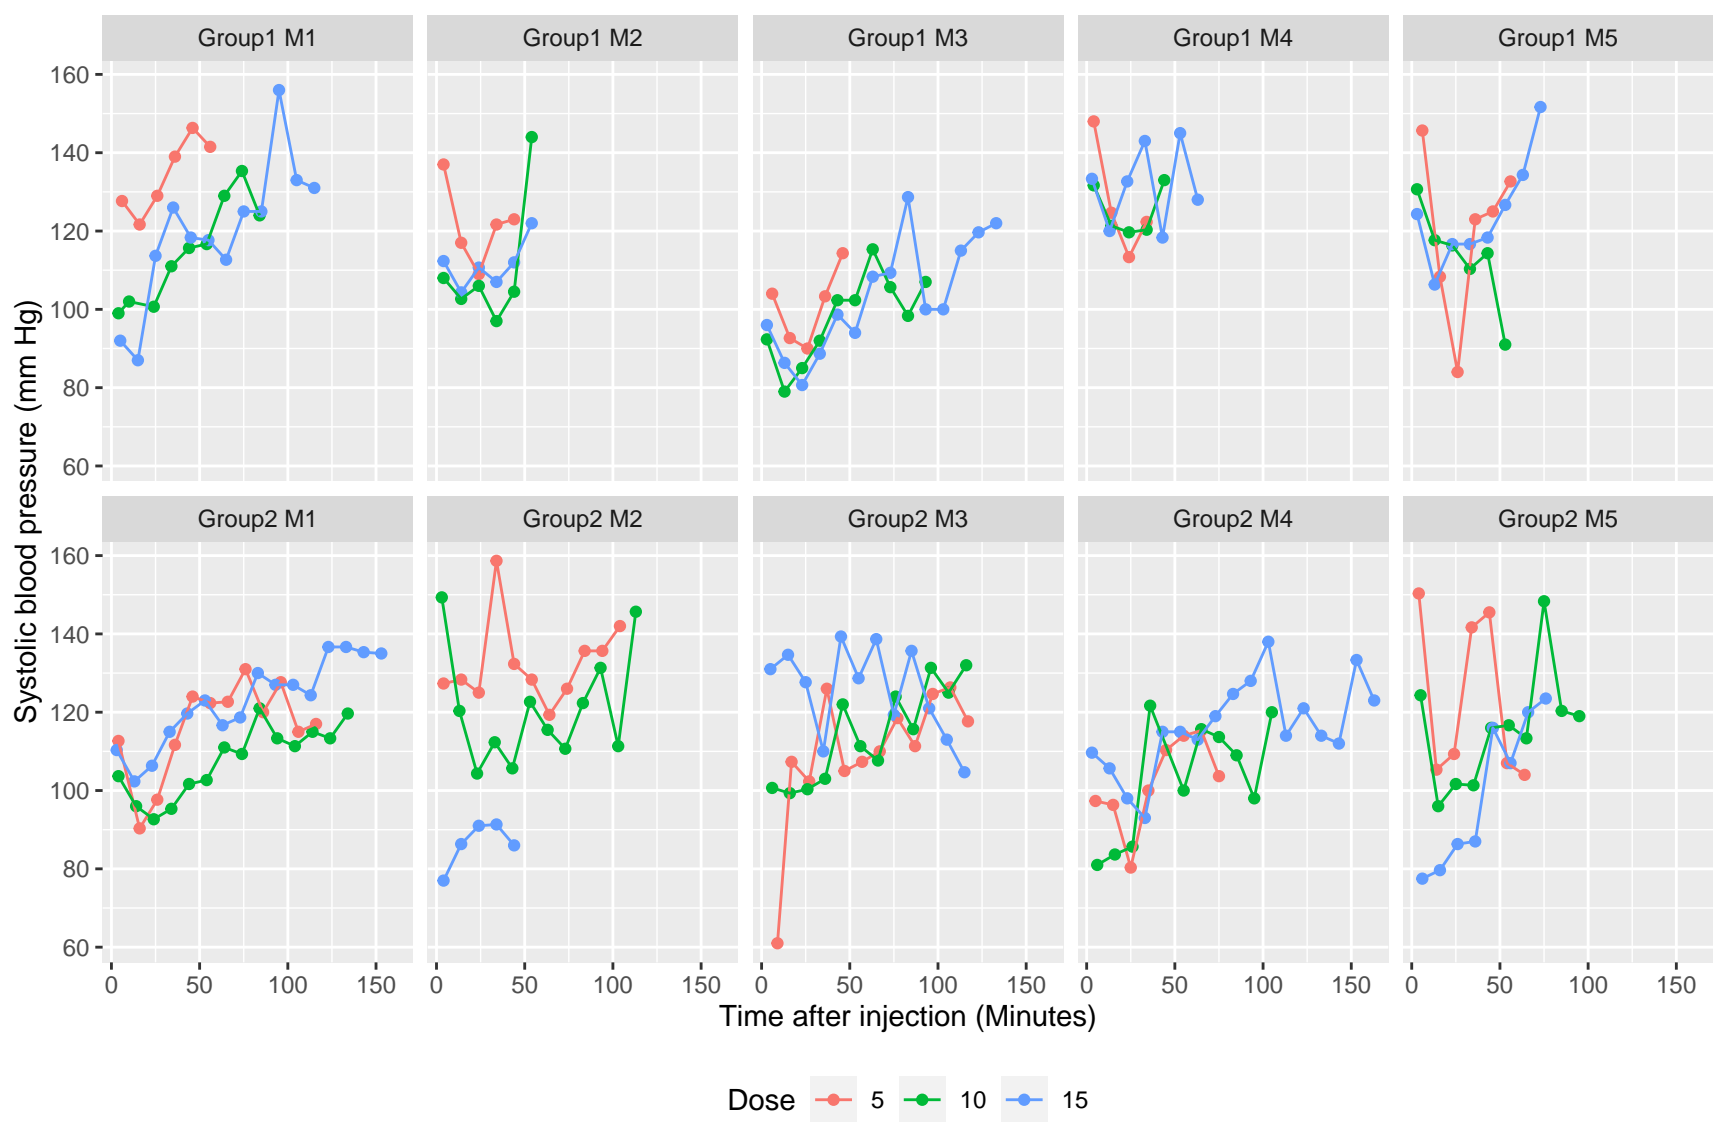

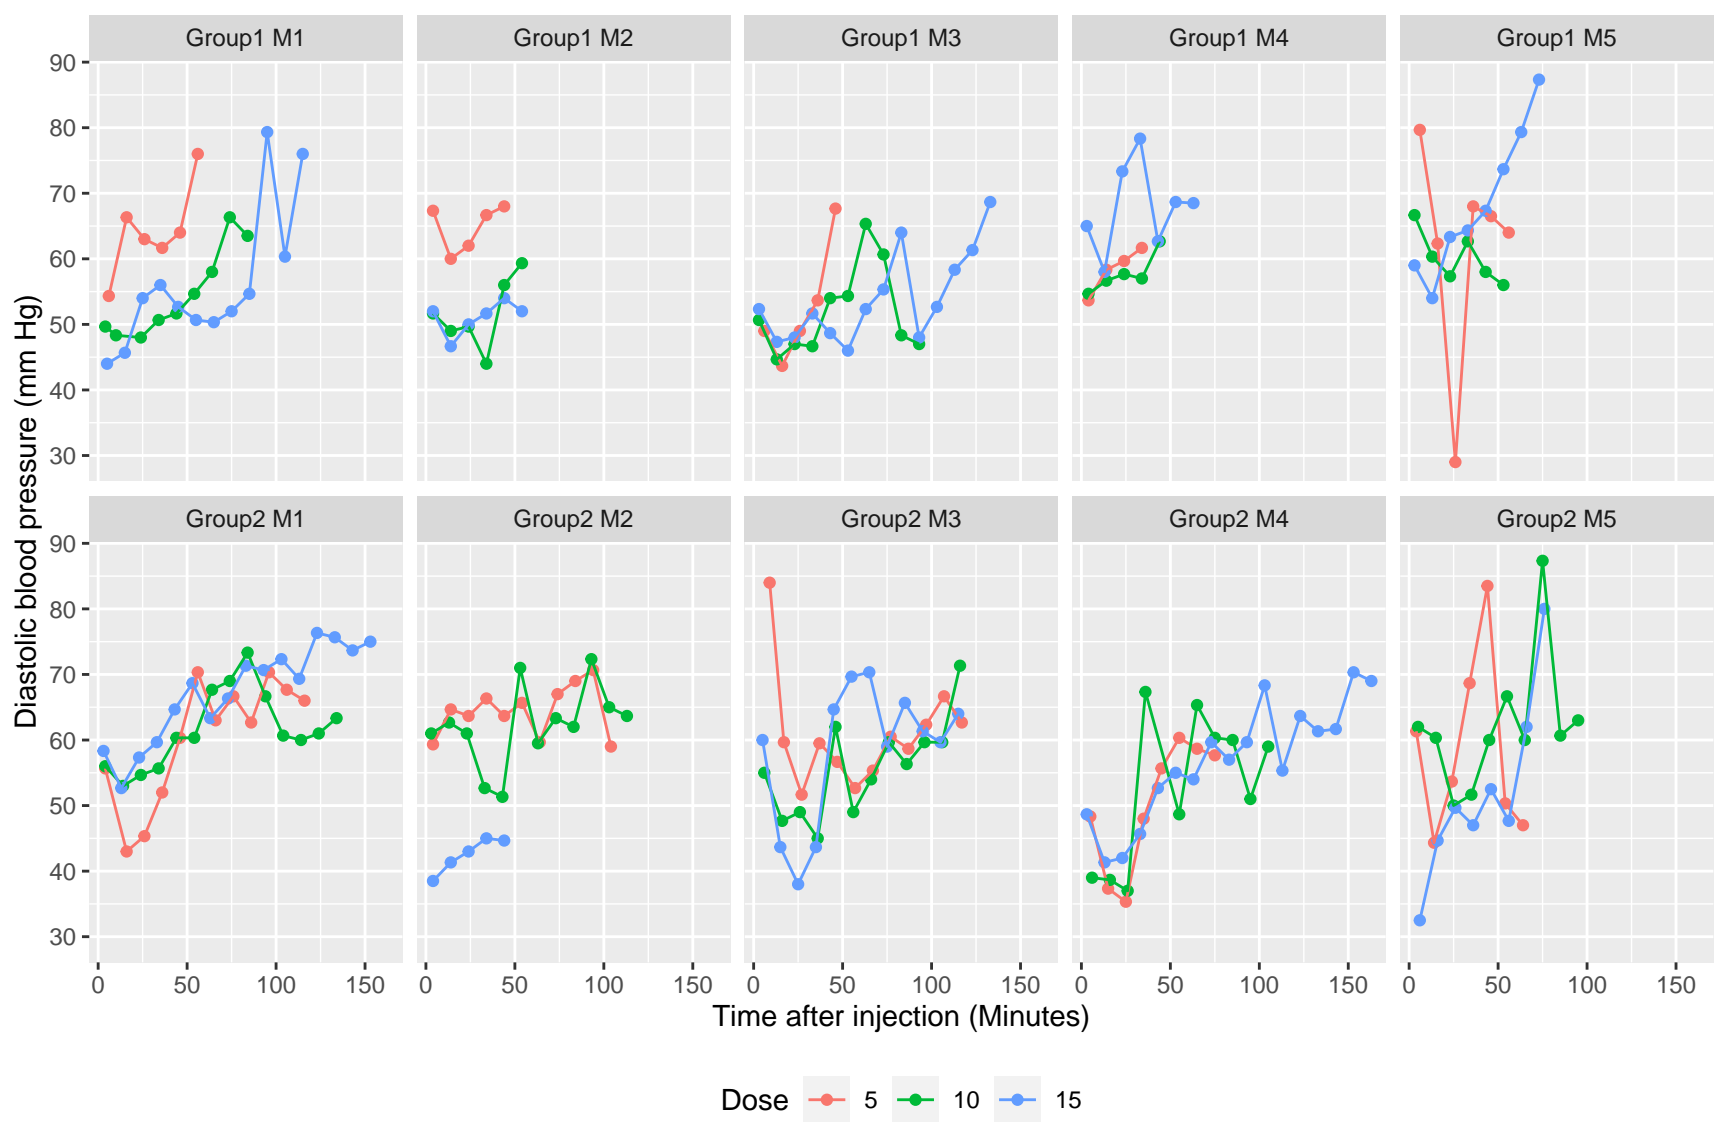



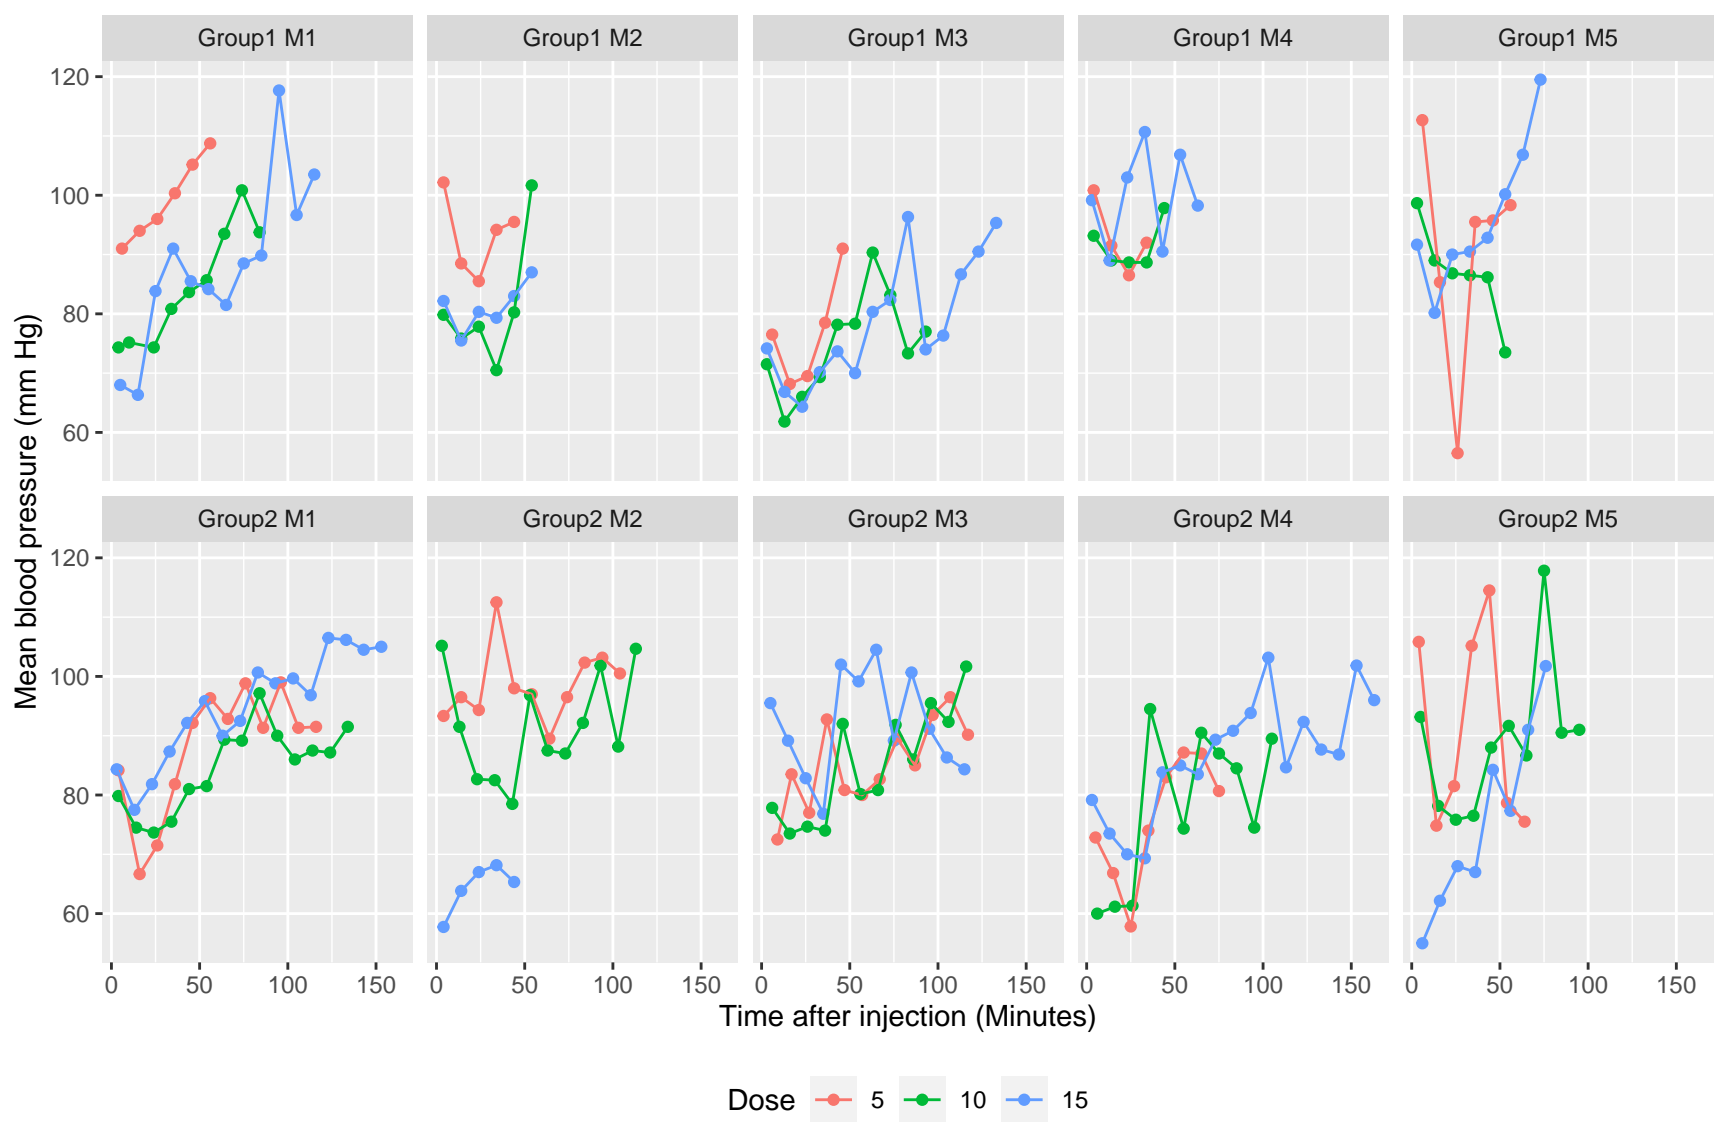

Supplement: s1 [file s1]
